# Supplementary material for: Examining COVID-19 Preventive Behaviors among Cancer Survivors in the United States: An Analysis of the COVID-19 Impact Survey
Source: Oxford University Press journal article supplement (doi:10.1158/1055-9965.epi-20-0801), 2020-09-25

Supplementary Figure 1: Preventive behaviors related to canceling appointments and activities in response to the COVID-19 pandemic among cancer survivors and the general adult population below the age of 60, COVID Impact Survey (April-June 2020)


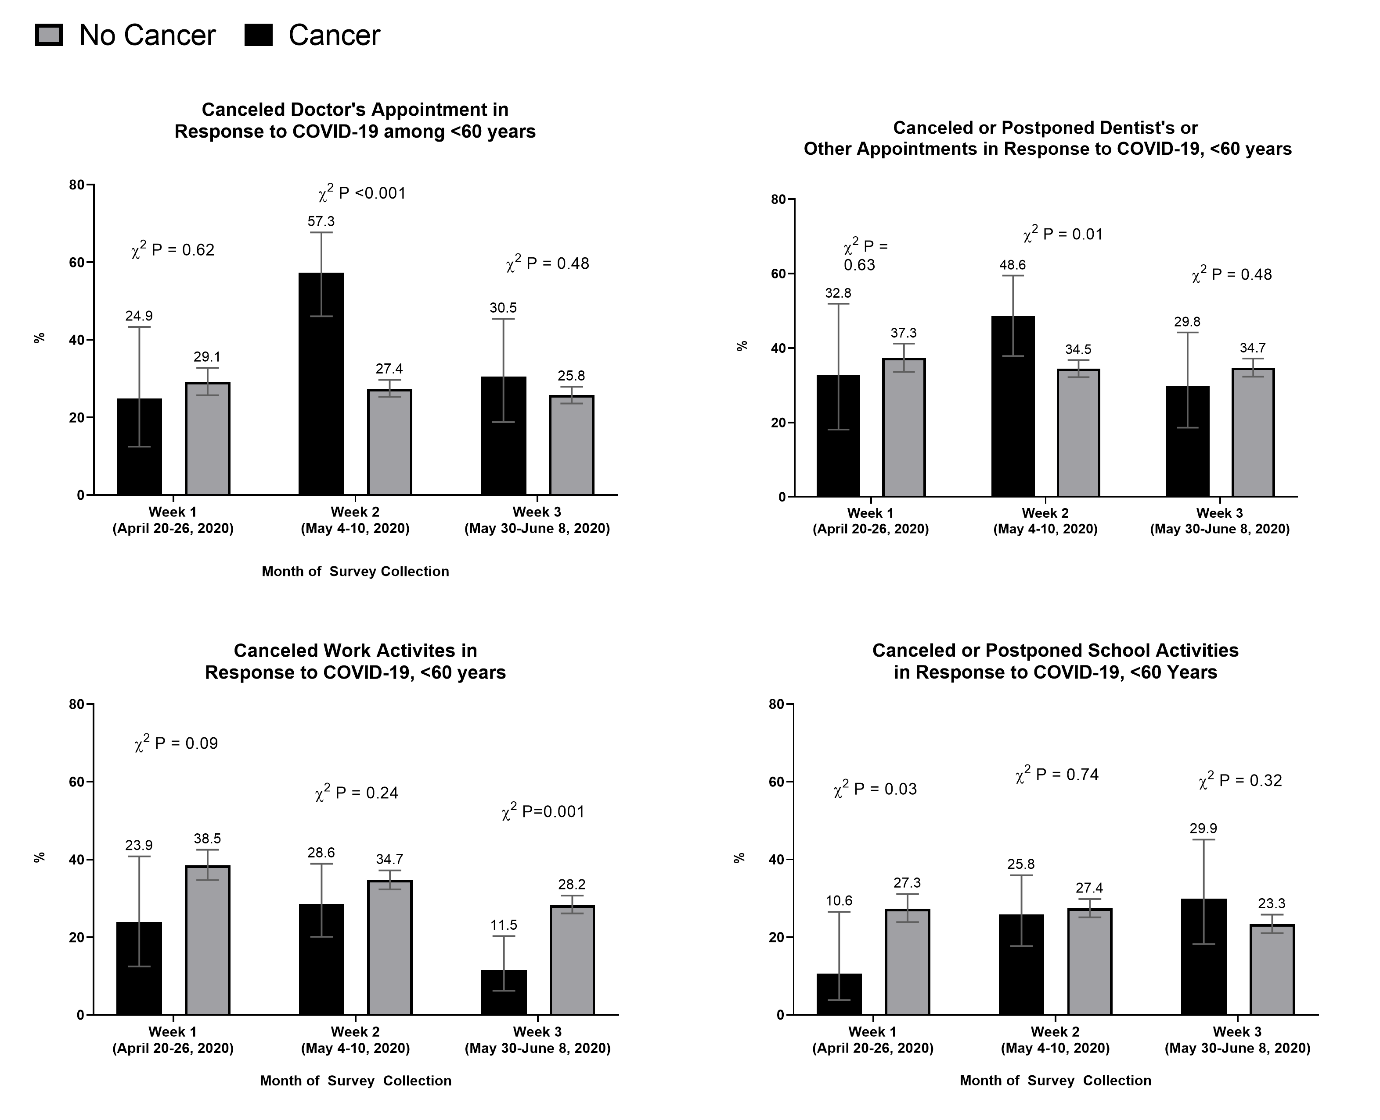

Supplement: 10559965epi200801-sup-243987_2_supp_6548042_qg3ztp.docx [file 10559965epi200801-sup-243987_2_supp_6548042_qg3ztp.docx]
